# Supplementary material
Source: publisher site journal article supplement (https://static.cambridge.org/content/id/urn:cambridge.org:id:article:S0967199419000649/resource/name/S0967199419000649supp001.docx)

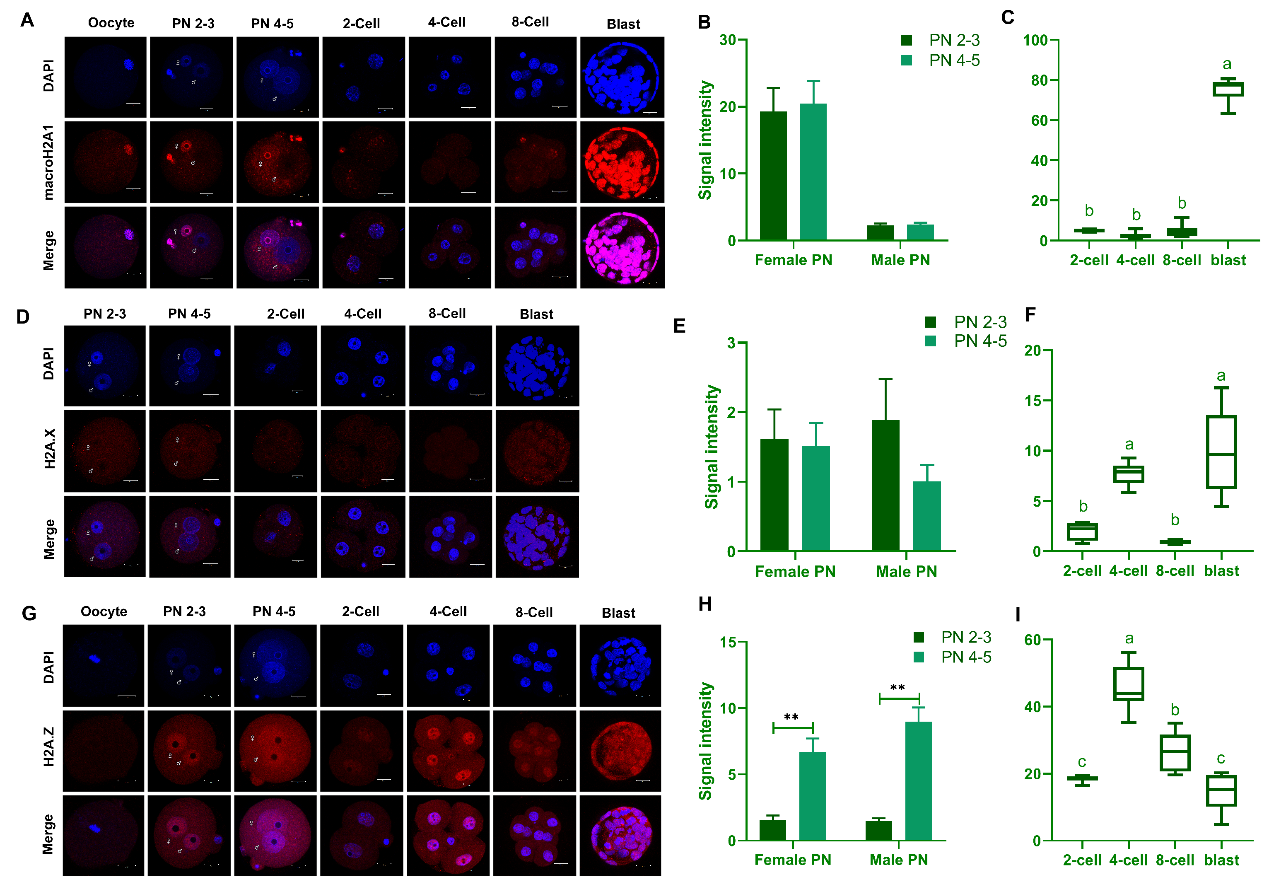


Figure 1.


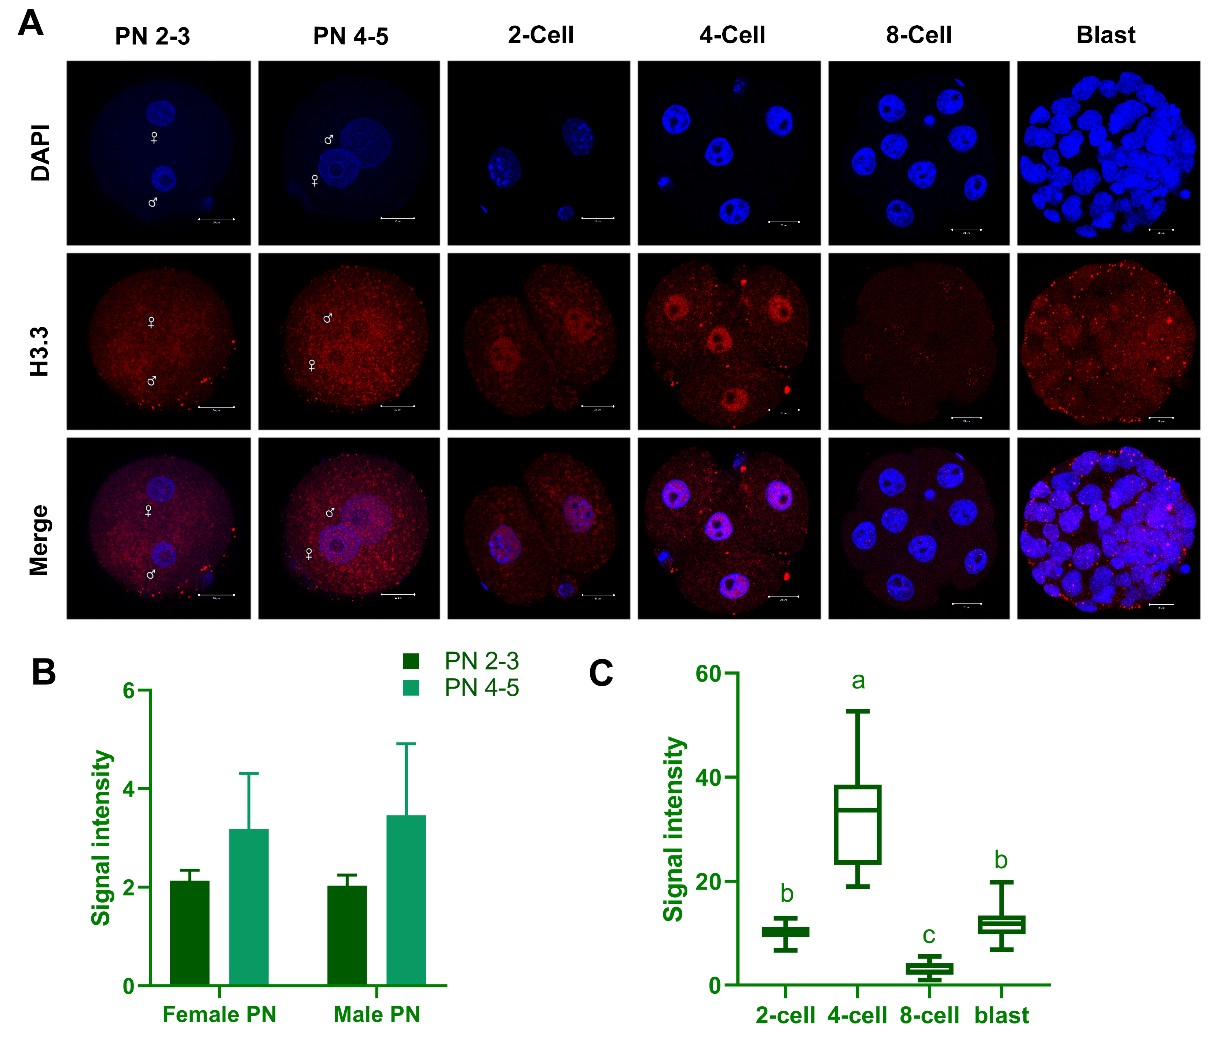


Figure 2.


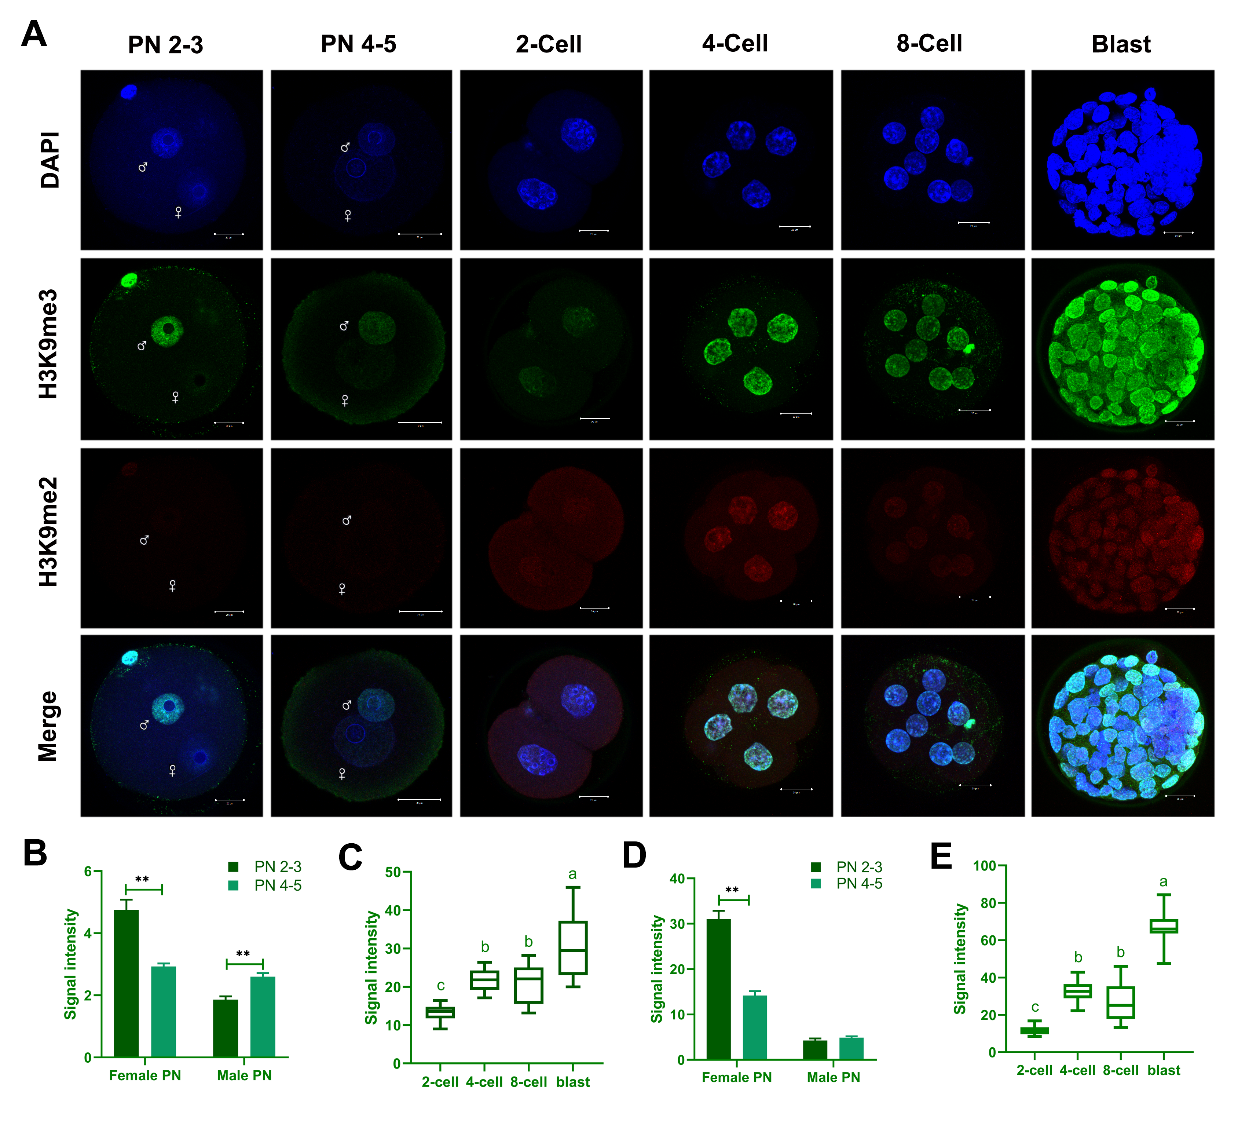


Figure 3.


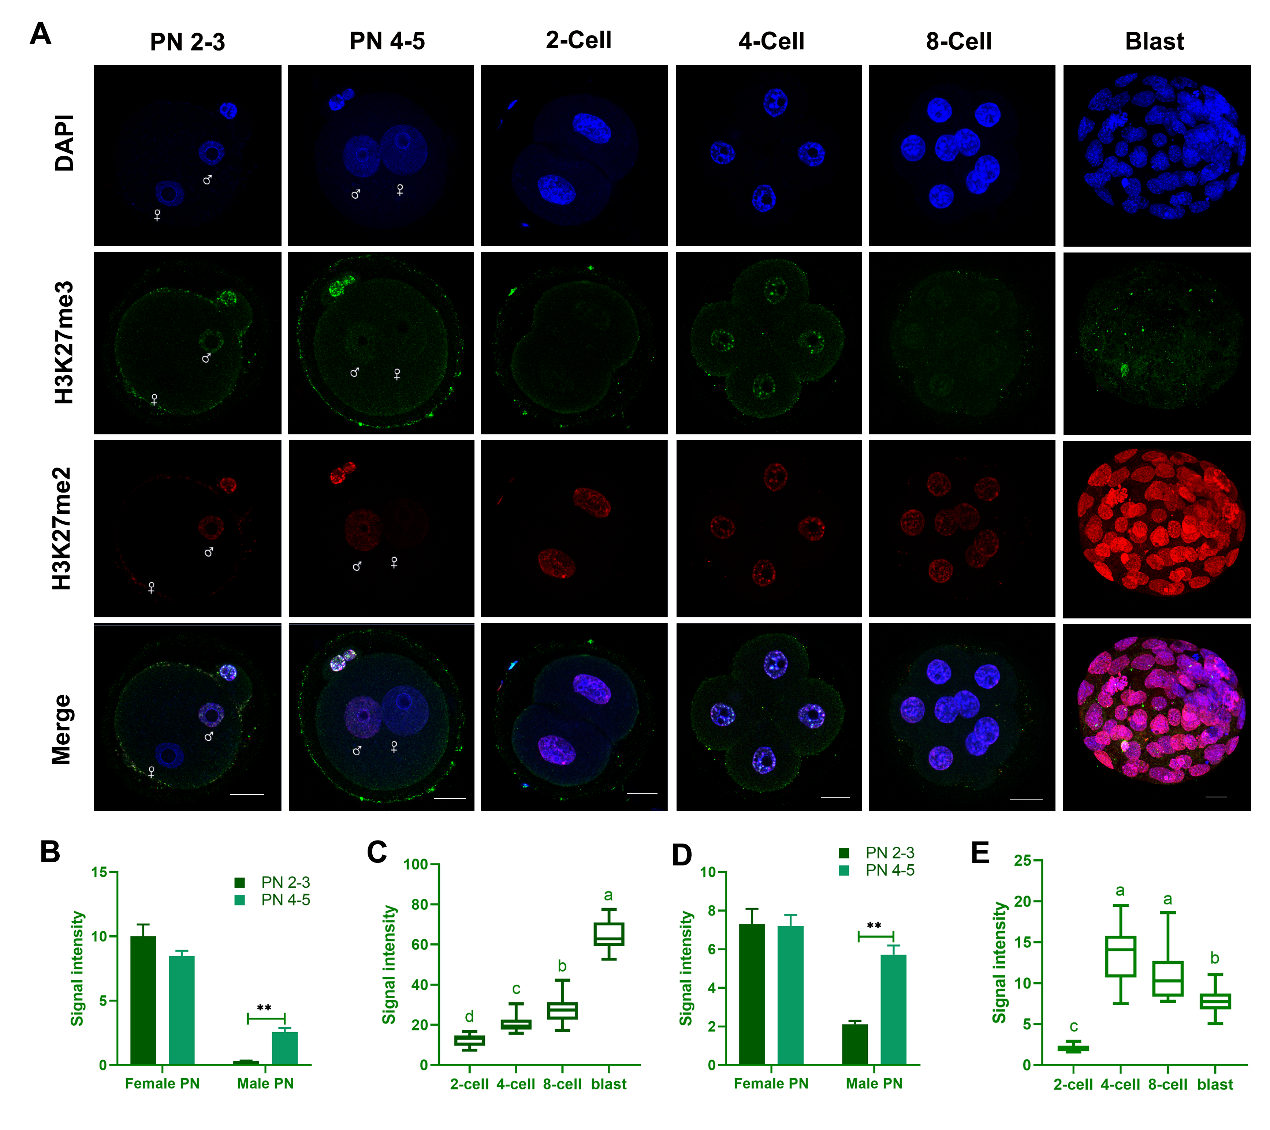


Figure 4.


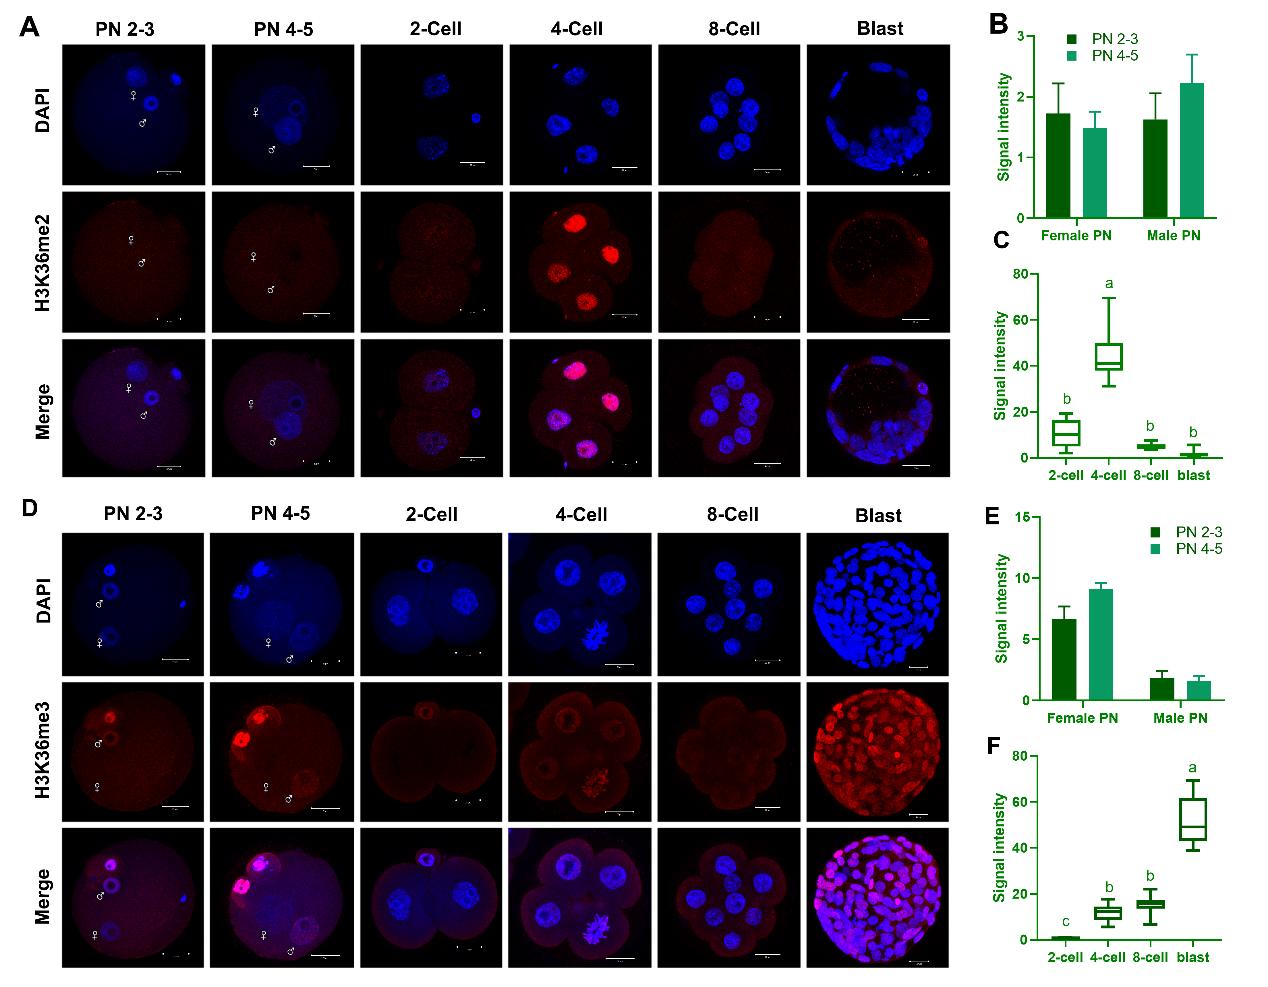


Figure 5.

Supplement: Supplementary file 1 [file S0967199419000649supp001.docx]
